# Supplementary material
Source: Royal Society of Chemistry journal article supplement (doi:10.1039/d6ta01435f)
Supplement: d6ta01435f1.pdf [file d6ta01435f1.pdf]

## Supporting Information

For

### **Atomic-Level Interfacial Engineering of Zr-In<sub>2</sub>S<sub>3</sub>/g-C<sub>3</sub>N<sub>4</sub> Z-Scheme Heterojunction for Enhanced Photocatalytic CO<sub>2</sub> Reduction**

*Ahmed Uddin,<sup>ab</sup> Muhammad Bilal,<sup>ab</sup> Qingquan He,<sup>ab</sup> Jinchun Qian,<sup>a</sup> Jun Pan,<sup>\*a</sup>*

<sup>a</sup> Science and Education Integration College of Energy and Carbon Neutralization | College of Materials Science and Engineering | Zhejiang Provincial Key Laboratory of Clean Energy Conversion and Utilization | State Key Laboratory of Green Chemical Synthesis and Conversion, Zhejiang University of Technology, Hangzhou 310014, China.

<sup>b</sup> Moganshan Institute ZJUT, Kangqian District, Deqing 313200, China.

\*Correspondence: [panjun0123@zjut.edu.cn](mailto:panjun0123@zjut.edu.cn)

## **Text Captions**

**Text S1.** Materials

**Text S2.** Preparation of g-C<sub>3</sub>N<sub>4</sub> nanosheet

**Text S3.** Preparation of Zirconium-doped In<sub>2</sub>S<sub>3</sub> nanoparticles

**Text S4.** Preparation of Zr-In<sub>2</sub>S<sub>3</sub>/g-C<sub>3</sub>N<sub>4</sub> heterojunctions

**Text S5.** Photocatalytic CO<sub>2</sub> reduction

**Text S6.** Density functional theory (DFT) calculations

**Text S7.** Characterizations

**Text S8.** Photoelectrochemical measurements

**Fig. S1** Comparison of pore size distributions of Zr-In<sub>2</sub>S<sub>3</sub>, g-C<sub>3</sub>N<sub>4</sub> and 20%Zr-In<sub>2</sub>S<sub>3</sub>/g-C<sub>3</sub>N<sub>4</sub>.

**Fig. S2** SEM images of as prepared photocatalysts (a) g-C<sub>3</sub>N<sub>4</sub> (b) Zr-In<sub>2</sub>S<sub>3</sub> (c) Zr-In<sub>2</sub>S<sub>3</sub>/g-C<sub>3</sub>N<sub>4</sub> (d) SEM-EDX profile.

**Fig. S3.** XPS survey of g-C<sub>3</sub>N<sub>4</sub>, Zr-In<sub>2</sub>S<sub>3</sub> and Zr-In<sub>2</sub>S<sub>3</sub>/g-C<sub>3</sub>N<sub>4</sub> (a) Zr 3d (b)

**Fig. S4** VBXPS peaks (a) Zr-In<sub>2</sub>S<sub>3</sub> (b) g-C<sub>3</sub>N<sub>4</sub>.

**Fig. S5** Photocatalytic and thermal-catalytic CO<sub>2</sub> conversion over 20%Zr-In<sub>2</sub>S<sub>3</sub>/g-C<sub>3</sub>N<sub>4</sub>.

**Fig. S6** Mott-Schottky(M-S) plots (a) Zr-In<sub>2</sub>S<sub>3</sub> (b) g-C<sub>3</sub>N<sub>4</sub>

**Table. S1.** The specific surface-area and pore-structure of as synthesized photocatalysts.

**Table. S2** The binding energy values of Zr-In<sub>2</sub>S<sub>3</sub>, g-C<sub>3</sub>N<sub>4</sub> and Zr-In<sub>2</sub>S<sub>3</sub>/g-C<sub>3</sub>N<sub>4</sub>.

**Table. S3** The calculated value of band gap energy, valence band potential and conduction band potentials over Zr-In<sub>2</sub>S<sub>3</sub> and g-C<sub>3</sub>N<sub>4</sub> nanosheet.

### **Text. S1 Materials**

Urea ( $\text{CH}_4\text{N}_2\text{O}$ )  $\geq 99.0\%$ , Dicyandiamide ( $\text{C}_2\text{H}_4\text{N}_4$ )  $\geq 99\%$ , Indium chloride ( $\text{InCl}_3 \cdot 4\text{H}_2\text{O}$ )  $\geq 98\%$  thioacetamide ( $\text{C}_2\text{H}_5\text{NS}$ )  $\geq 98\%$  and Zirconium nitrate ( $\text{Zr}(\text{NO}_3)_4$ )  $\geq 99\%$ , were acquired from Sinopharm Chemical Reagent (Co., Ltd). Shanghai China and were used in this work as procured without any further purification.

### **Text. S2 Preparation of g- $\text{C}_3\text{N}_4$ nanosheet**

g- $\text{C}_3\text{N}_4$  sheets were synthesized through a pyrolysis process involving urea and dicyandiamide. Specifically, 10 g of urea mixed with 2 g of dicyandiamide was placed in a covered alumina crucible. This mixture was then subjected to pyrolysis in a muffle furnace at  $550\text{ }^\circ\text{C}$  for 4 h, with a heating rate of  $2\text{ }^\circ\text{C min}^{-1}$  in air. After cooling to room temperature, the resulting yellow product was thoroughly washed with deionized (DI) water, rinsed with ethanol several times, and dried at  $60\text{ }^\circ\text{C}$  overnight.

### **Text. S3 Preparation of Zirconium-doped $\text{In}_2\text{S}_3$ nanoparticles**

Zr- $\text{In}_2\text{S}_3$  nanoparticles were prepared via a hydrothermal procedure. Initially, 2.5 g of  $\text{InCl}_3 \cdot 4\text{H}_2\text{O}$  and 3 g of thioacetamide ( $\text{C}_2\text{H}_5\text{NS}$ ) were dissolved in Ethylene glycol. Subsequently, 1.20 g of Zirconium nitrate ( $\text{Zr}(\text{NO}_3)_4$ ) was added to the solution. After thorough stirring, the mixture was transferred to an autoclave and heated at  $200\text{ }^\circ\text{C}$  for 24 h. After cooling to room temperature, the Zr- $\text{In}_2\text{S}_3$  nanoparticles were separated by centrifugation, rinsed with ethanol and deionized water, and then dried under vacuum at  $40\text{ }^\circ\text{C}$  for 12 h.

### **Text. S4 Preparation of Zr- $\text{In}_2\text{S}_3$ /g- $\text{C}_3\text{N}_4$ heterojunctions**

Zr- $\text{In}_2\text{S}_3$ /g- $\text{C}_3\text{N}_4$  heterojunctions were synthesized through a modified hydrothermal process. Initially, 200 mg of the as-prepared g- $\text{C}_3\text{N}_4$ , 1.5 g of  $\text{InCl}_3 \cdot 4\text{H}_2\text{O}$ , and 2.25 g of  $\text{C}_2\text{H}_5\text{NS}$  (TAA) were dissolved in ethylene glycol. Various amounts of  $\text{Zr}(\text{NO}_3)_4$  (10%, 20%, and 30% by weight) were then added under magnetic stirring to achieve the desired Zr doping

concentrations. After vigorous stirring, the mixture was transferred into a Teflon-lined autoclave and heated at 200 °C for 24 h. The final products were annealed at 500 °C for 2 h, followed by washing several times with deionized water and ethanol, and dried for experimental usage. The obtained samples were denoted as (X)% Zr-doped In<sub>2</sub>S<sub>3</sub>/g-C<sub>3</sub>N<sub>4</sub>, where X represents the Zr weight percentage.

#### **Text. S5 Photocatalytic CO<sub>2</sub> reduction**

Photocatalytic CO<sub>2</sub> reduction experiments were carried out in a closed quartz reactor with a total volume of approximately 100 mL). A 15 mg sample of the synthesized photocatalyst was dispersed in deionized water and deposited onto a quartz substrate (2 × 2 cm<sup>2</sup>) via drop-casting. The substrate was dried under ambient conditions and placed inside a reactor containing 5 mL of deionized water at the base. Prior to illumination, the reactor was purged with high-purity CO<sub>2</sub> (99.999%), saturated with water vapor, for 25 min to eliminate residual oxygen. The reaction temperature was stabilized at 25 °C using a circulating water cooling system. A 300 W Xe lamp (HF-GHX-XE-300, Shanghai Hefan Instrument Co., Ltd.) provided simulated solar illumination. The evolved gaseous products were analyzed in real time using an online gas chromatograph (GC-7890, Shandong Jinpu Analytical Instrument Co., Ltd.) equipped with flame ionization (FID) and thermal conductivity (TCD) detectors.

#### **Text. S6 Density functional theory (DFT) calculations**

DFT calculations were performed using the VASP software, employing the generalized Perdew–Burke–Ernzerhof (PBE) approximation and the projector augmented-wave (PAW) methodology. A Monkhorst-Pack k-point grid of 3×2 ×1 was applied for geometry optimizations of the unit cell, with a vacuum layer of approximately 10 Å inserted to prevent interactions between periodic images. The plane-wave energy cutoff was set to 500 eV. The

convergence criteria were set to  $1 \times 10^{-5}$  eV per atom for total energy and  $0.02 \text{ eV} \cdot \text{\AA}^{-1}$  for the maximum force.

### **Text. S7 Characterizations**

Powder X-ray diffraction (XRD) patterns were verified using a PANalytical X'Pert PRO MPD diffractometer with Cu K $\alpha$  radiation ( $\lambda = 1.5406 \text{ \AA}$ ), operating at 40 kV and 30 mA. Scanning electron microscopy (SEM) images were acquired using a JSM-6700 microscope operated at an accelerating voltage of 5.0 kV. Transmission electron microscopy (TEM), high-resolution TEM (HR-TEM), high-angle annular dark-field scanning TEM (HAADF-STEM), energy-dispersive X-ray spectroscopy (EDS), and elemental mapping were accompanied using JEM-2100 and Tecnai G2 F20 U-TWIN microscopes, both operated at 200 kV. X-ray photoelectron spectroscopy (XPS) was carried out using an ESCALab 220i-XL spectrometer (VG Scientific) equipped with a 300 W Al K $\alpha$  X-ray source. Diffuse reflectance spectra (DRS) were documented using a UV–Vis spectrophotometer (Cary 5000, Varian) with an integrating sphere, using BaSO<sub>4</sub> as the reference. Mott-Schottky analysis, electrochemical impedance spectroscopy (EIS), and time-resolved photocurrent measurements were performed on a CH Instruments electrochemical workstation in a standard three electrode configuration, with the sample coated FTO glass as the working electrode, a Pt foil as the counter electrode, and Ag/AgCl as the reference electrode, using 0.1 M Na<sub>2</sub>SO<sub>4</sub> as the electrolyte. Time-resolved and steady state photoluminescence (PL) spectra were documented using a NanoLOG-TCSPC spectrofluorometer (HORIBA Jobin Yvon) under 270 nm excitation.

### **Text. S8 Photoelectrochemical measurements**

Electrochemical impedance spectroscopy (EIS), and transient photocurrent response measurements were carried out using a CHI 660E electrochemical workstation in a standard three-electrode setup. The working electrode was prepared by coating the synthesized

photocatalyst onto indium tin oxide (ITO) glass substrates, with a platinum wire and an Ag/AgCl electrode (saturated KCl) serving as the counter and reference electrodes, respectively. For the photocurrent measurements, three consecutive light on/off cycles were conducted. To fabricate the working electrode, 5 mg of the catalyst powder was dispersed in a solution containing 4 mL of ethanol and 15  $\mu$ L of Nafion to form a uniform slurry. This slurry was evenly applied to a  $1 \times 1$  cm<sup>2</sup> area of the ITO substrate and then dried at 40 °C in an oven for 6 hours.

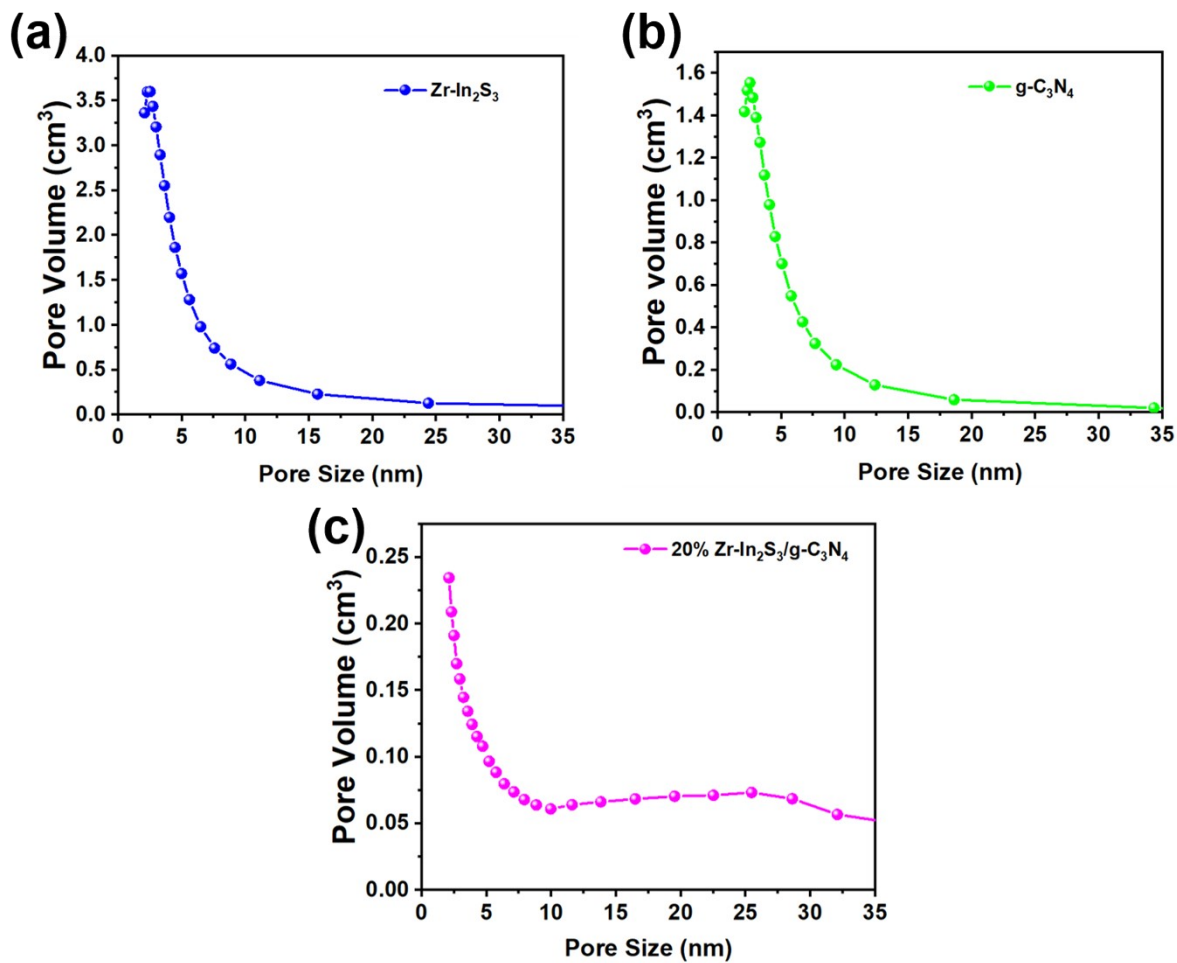

**Fig. S1.** Comparison of pore size distributions of (a) Zr-In<sub>2</sub>S<sub>3</sub>, (b) g-C<sub>3</sub>N<sub>4</sub>, and (c) 20%Zr-In<sub>2</sub>S<sub>3</sub>/g-C<sub>3</sub>N<sub>4</sub>.

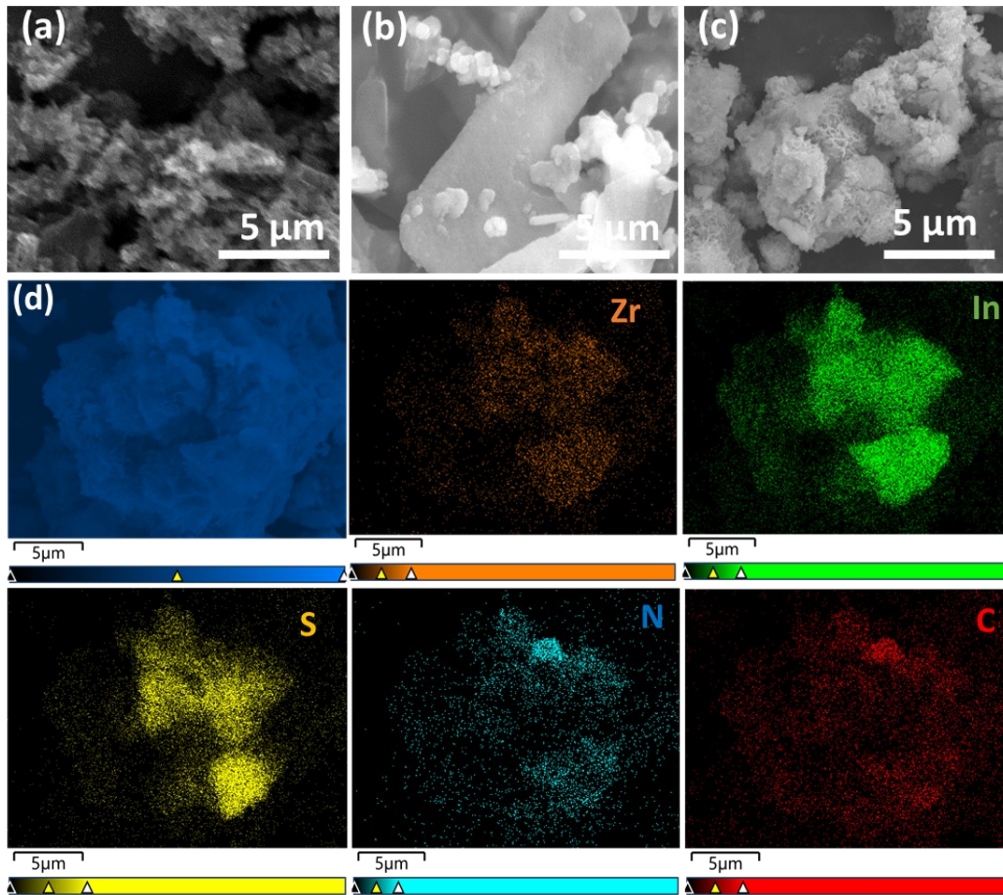

**Fig. S2.** Scanning electron microscopy (SEM) image (a) g-C<sub>3</sub>N<sub>4</sub> (b) Zr-In<sub>2</sub>S<sub>3</sub> and (c) Zr-In<sub>2</sub>S<sub>3</sub>/g-C<sub>3</sub>N<sub>4</sub> (d) energy dispersive X-ray spectroscopy (EDX) elemental mapping of Zr, In, S, N and C elements in Zr-In<sub>2</sub>S<sub>3</sub>/g-C<sub>3</sub>N<sub>4</sub> heterojunction.

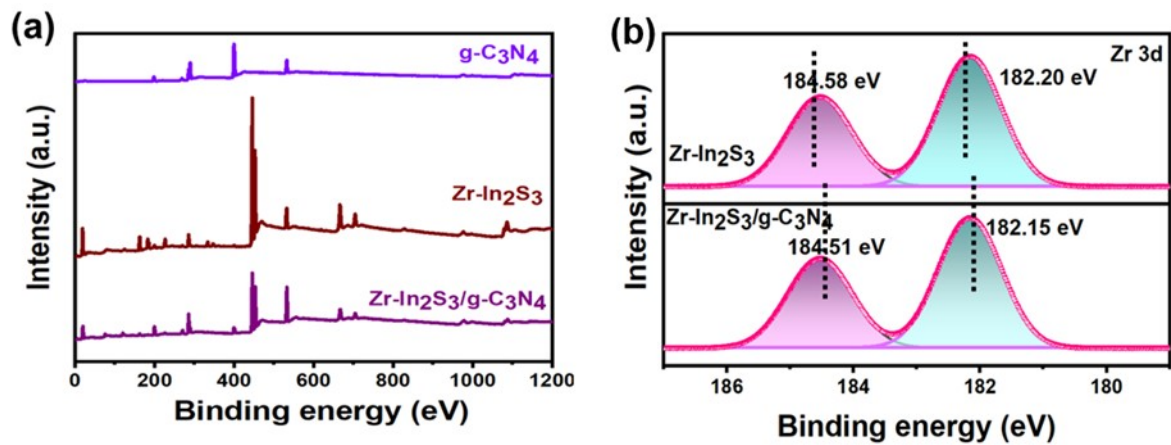

**Fig. S3.** XPS survey of Zr-In<sub>2</sub>S<sub>3</sub>, g-C<sub>3</sub>N<sub>4</sub>, and Zr-In<sub>2</sub>S<sub>3</sub>/g-C<sub>3</sub>N<sub>4</sub> (a) XPS spectra Zr 3d (b)

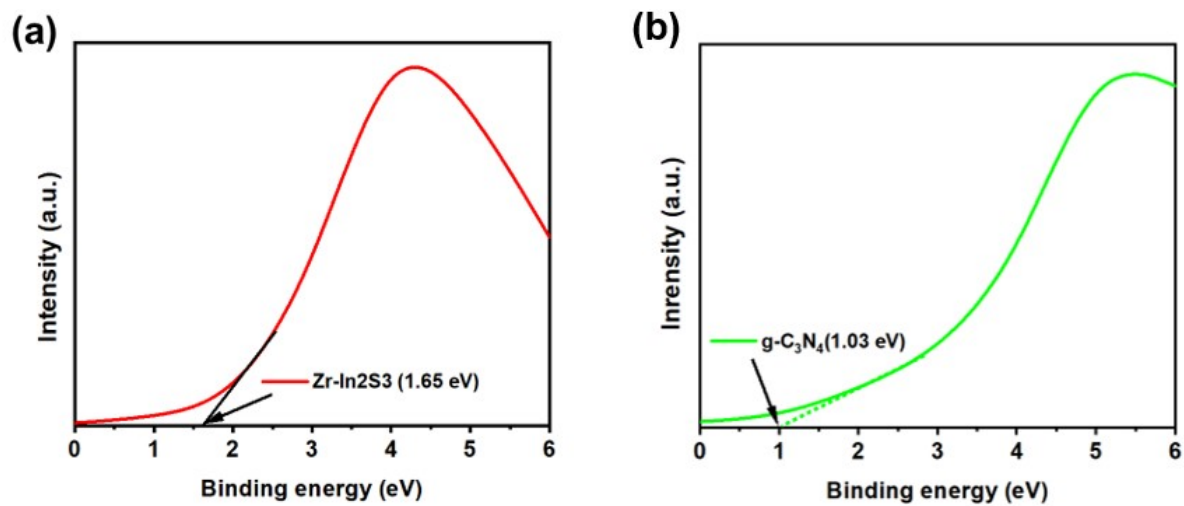

**Fig. S4.** VB XPS peaks (a) Zr-In<sub>2</sub>S<sub>3</sub> (b) g-C<sub>3</sub>N<sub>4</sub>

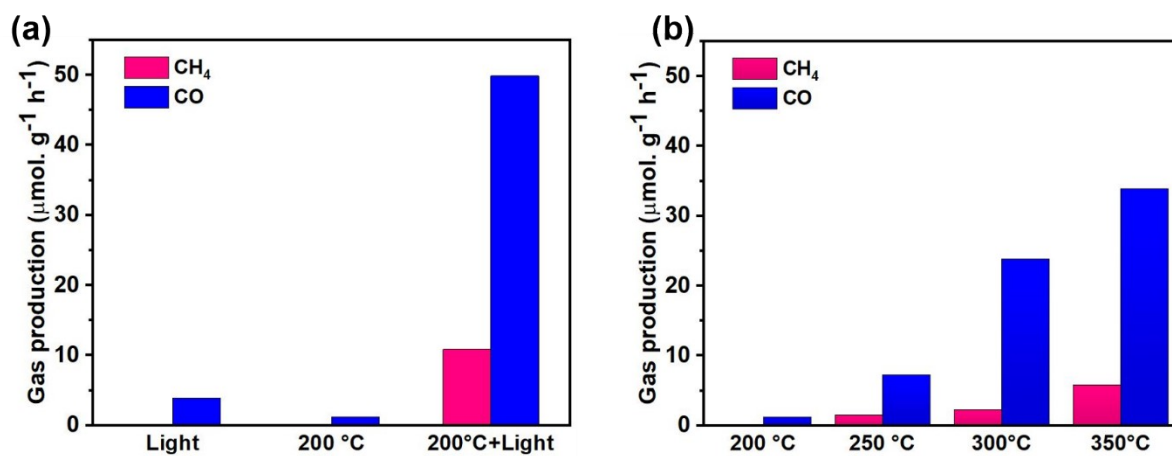

Fig. S5. Photocatalytic and thermal-catalytic  $\text{CO}_2$  conversion over 20%Zr- $\text{In}_2\text{S}_3/\text{g-C}_3\text{N}_4$ .

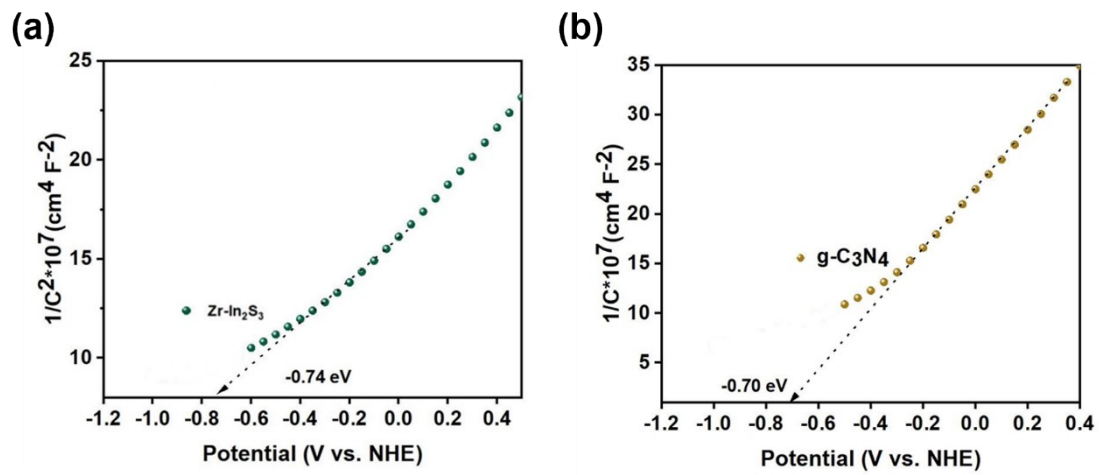

**Fig. S6.** Mott-Schottky (M-S) plots (a) Zr-In<sub>2</sub>S<sub>3</sub> (b) g-C<sub>3</sub>N<sub>4</sub>.

**Table. S1.** The specific surface-area and pore-structure of as synthesized photocatalysts.

| Samples                                                                   | Pore Volume<br>(cm <sup>3</sup> /g) | Pore Size<br>(nm) | Specific Surface Area<br>(m <sup>2</sup> /g) |
|---------------------------------------------------------------------------|-------------------------------------|-------------------|----------------------------------------------|
| Zr-In <sub>2</sub> S <sub>3</sub>                                         | 0.22                                | 2.49              | 34.19                                        |
| g-C <sub>3</sub> N <sub>4</sub>                                           | 0.08                                | 2.52              | 13.29                                        |
| 20%Zr-In <sub>2</sub> S <sub>3</sub> /g-<br>C <sub>3</sub> N <sub>4</sub> | 0.39                                | 2.10              | 73.62                                        |

**Table. S2** The binding energy values of Zr-In<sub>2</sub>S<sub>3</sub>, g-C<sub>3</sub>N<sub>4</sub> and Zr-In<sub>2</sub>S<sub>3</sub>/g-C<sub>3</sub>N<sub>4</sub>

| Peak-Name | Zr-In <sub>2</sub> S <sub>3</sub> /peak value (eV) | g-C <sub>3</sub> N <sub>4</sub> /peak value (eV) | Zr-In <sub>2</sub> S <sub>3</sub> /g-C <sub>3</sub> N <sub>4</sub> /peak value (eV) |
|-----------|----------------------------------------------------|--------------------------------------------------|-------------------------------------------------------------------------------------|
| C 1s      |                                                    | 288.49                                           | 288.78                                                                              |
| C 1s      |                                                    | 284.78                                           | 285.01                                                                              |
| N 1s      |                                                    | 400.22                                           | 399.85                                                                              |
| N 1s      |                                                    | 398.90                                           | 398.62                                                                              |
| Zr 3d     | 184.58                                             | -                                                | 184.51                                                                              |
| Zr 3d     | 182.20                                             | -                                                | 182.15                                                                              |
| In 3d     | 452.71                                             |                                                  | 452.34                                                                              |
| In 3d     | 445.15                                             |                                                  | 444.77                                                                              |
| S 2p      | 161.38                                             |                                                  | 162.40                                                                              |
| S 2p      | 162.53                                             |                                                  | 162.60                                                                              |

**Table. S3** The calculated value of band gap energy, valence band potential and conduction band potentials over Zr-In<sub>2</sub>S<sub>3</sub> and g-C<sub>3</sub>N<sub>4</sub> nanosheet.

| Photocatalysts                    | Band gap energy (eV) | Valence band potential (eV) | Conduction band potential (eV) |
|-----------------------------------|----------------------|-----------------------------|--------------------------------|
| Zr-In <sub>2</sub> S <sub>3</sub> | 2.75                 | 1.65                        | -1.1                           |
| g-C <sub>3</sub> N <sub>4</sub>   | 2.33                 | 1.03                        | -1.3                           |

**Table. S4.** The calculated PL lifetimes ( $\tau_1$  and  $\tau_2$ ) and their corresponding amplitude factors ( $A_1$  and  $A_2$ )

| Samples                                                               | $\tau_1$ and $\tau_2$ | $A_1$ and $A_2$ | $\Gamma_{\text{avg}}$ |
|-----------------------------------------------------------------------|-----------------------|-----------------|-----------------------|
| Zr-In <sub>2</sub> S <sub>3</sub>                                     | 0.22                  | 2.97            | 3.92                  |
| g-C <sub>3</sub> N <sub>4</sub>                                       | 0.08                  | 3.32            | 3.90                  |
| 20%Zr-In <sub>2</sub> S <sub>3</sub> /g-C <sub>3</sub> N <sub>4</sub> | 0.39                  | 28.60           | 4.87                  |
